# Supplementary material
Source: publisher figshare collection journal article supplement (https://acs.figshare.com/ndownloader/files/17970431)
Supplement: Supplementary file 1 [file 17970431]

*Supporting Information for*

**Bifunctional Electrocatalytic Activity of  
Bis(iminothiolato)nickel Monolayer for Overall Water  
Splitting**

Xiaohan Song, Junru Wang, Siyun Qi, Yingcai Fan, Weifeng Li, Mingwen Zhao\*

*School of Physics and State Key Laboratory of Crystal Materials, Shandong*

*University, Jinan 250100, China*

Corresponding author, E-mail: zmw@sdu.edu.cn

**Table S1.** Zero-point energy correction ( $E_{\text{ZPE}}$ ) of the adsorbates considered in this work.

| <b>NiIT</b> | <b><math>E_{\text{ZPE}}(\text{eV})</math></b> | <b>FeIT</b> | <b><math>E_{\text{ZPE}}(\text{eV})</math></b> |
|-------------|-----------------------------------------------|-------------|-----------------------------------------------|
| <b>OH*</b>  | 0.39                                          | <b>OH*</b>  | 0.4                                           |
| <b>O*</b>   | 0.08                                          | <b>O*</b>   | 0.08                                          |
| <b>OOH*</b> | 0.47                                          | <b>OOH*</b> | 0.46                                          |
| <b>H*</b>   | 0.34                                          | <b>H*</b>   | 0.33                                          |

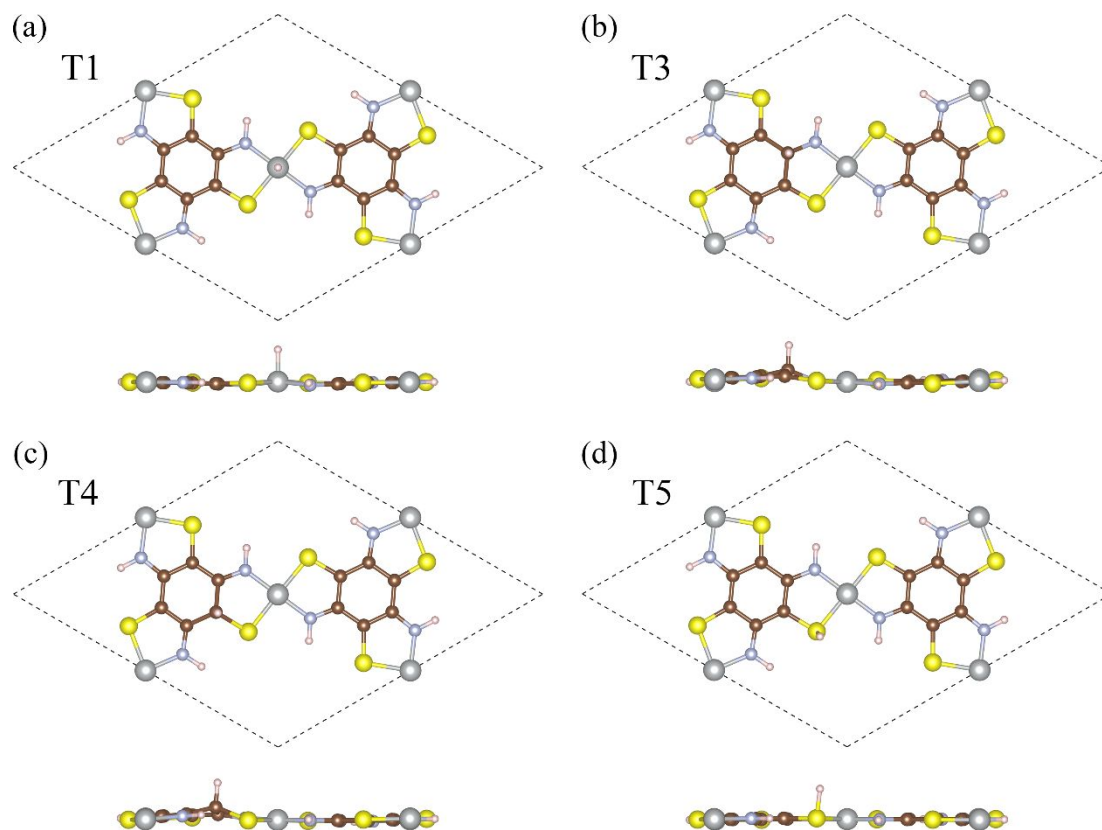

**Figure S1.** The HER intermediate ( $H^*$ ) at (a) T1, (b) T3, (c) T4 and (d) T5 sites of the NiIT monolayer.

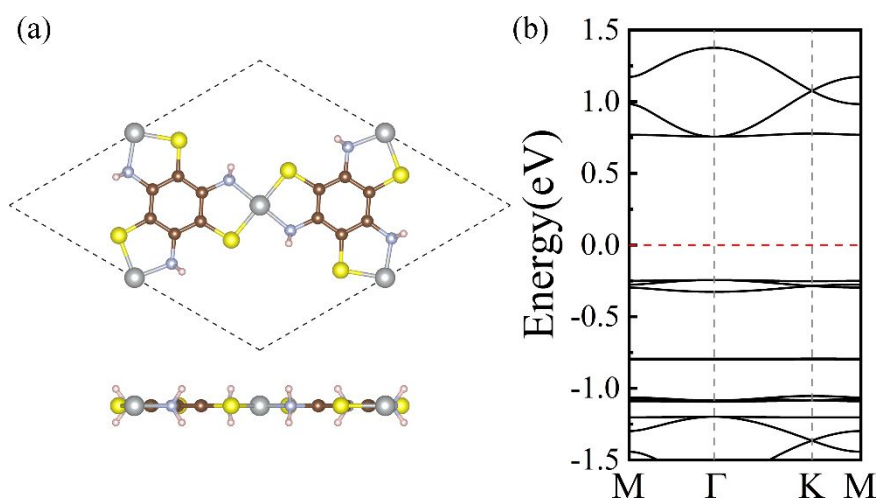

**Figure S2.** (a) Top (upper) and side (bottom) views of optimized structure of the NiAT monolayer where the N atom is terminated by two H atoms. The dashed diamond marks the primitive cell of the monolayer. (b) Band structure of NiAT monolayer. The energy at the Fermi level was set to zero.

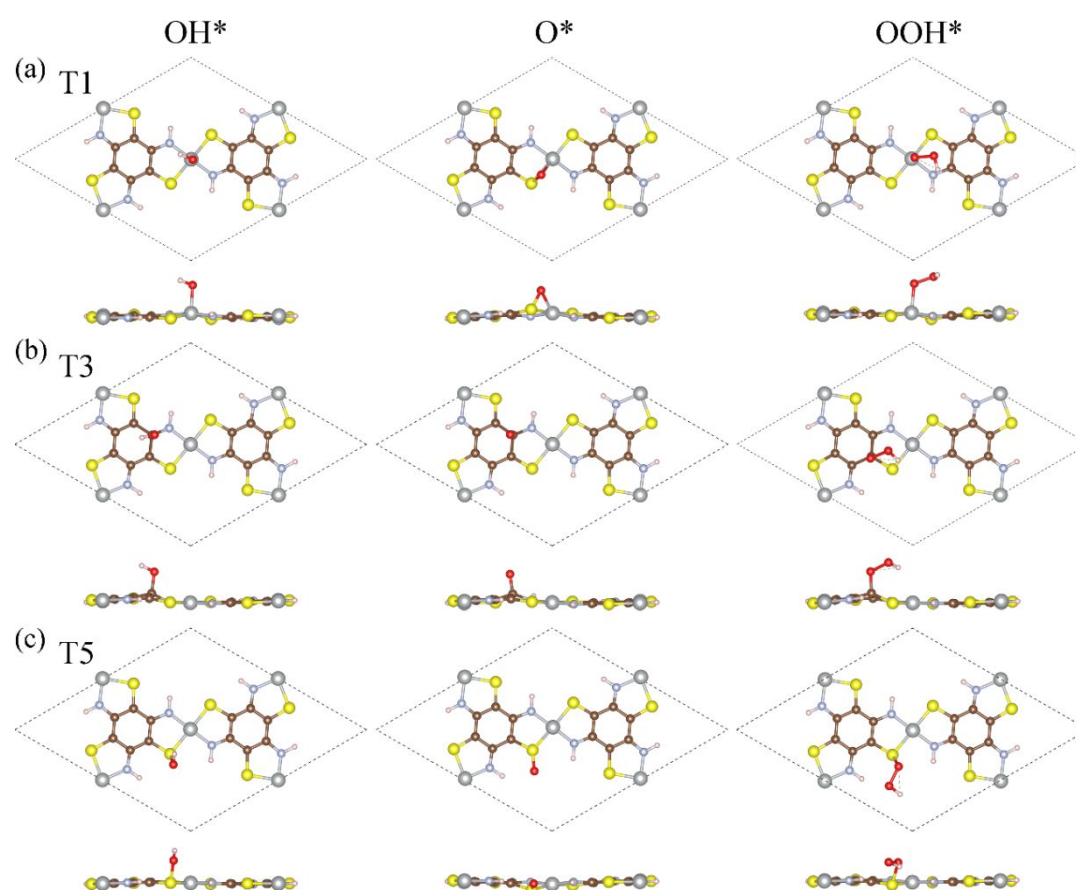

**Figure S3.** The OER intermediates ( $\text{OH}^*$ ,  $\text{O}^*$ , and  $\text{OOH}^*$ ) at (a)T1, (b)T3 and (c)T5 sites of the NiIT monolayer.

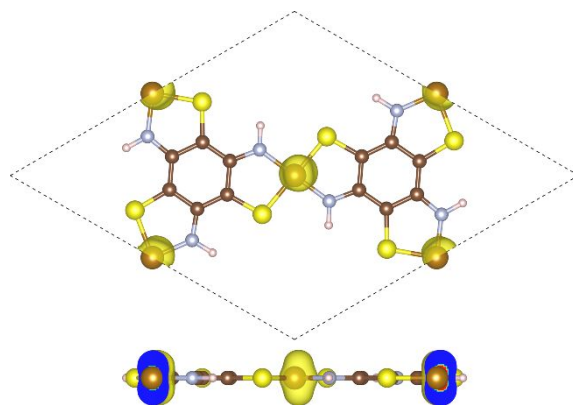

**Figure S4.** Top (upper) and side (bottom) views of the spin density isosurfaces of the FeIT monolayer.

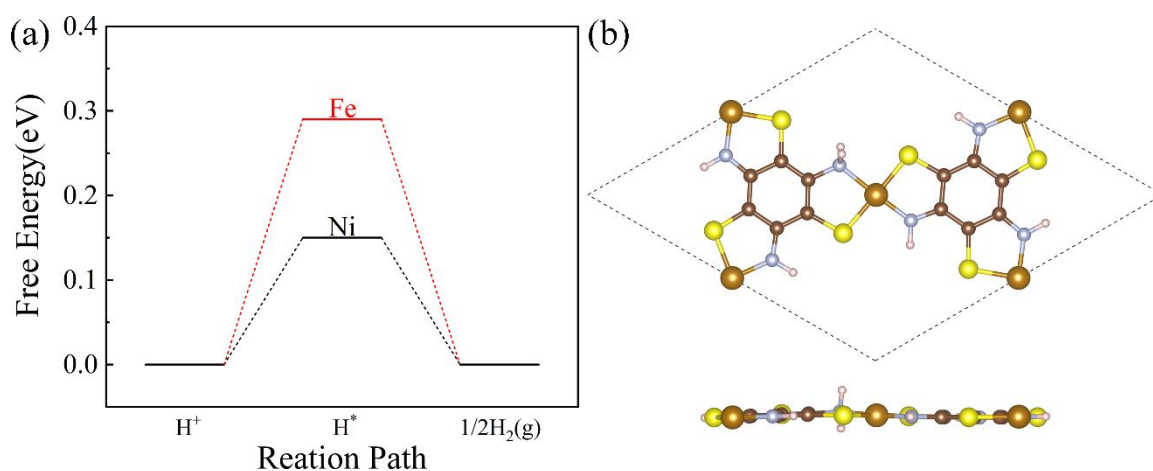

**Figure S5.** (a)The calculated HER Gibbs free energy diagram at T2 site of NiIT and FeIT monolayer at zero potential ( $U = 0$ ). (b)The corresponding structure configurations of HER intermediates of FeIT monolayer.

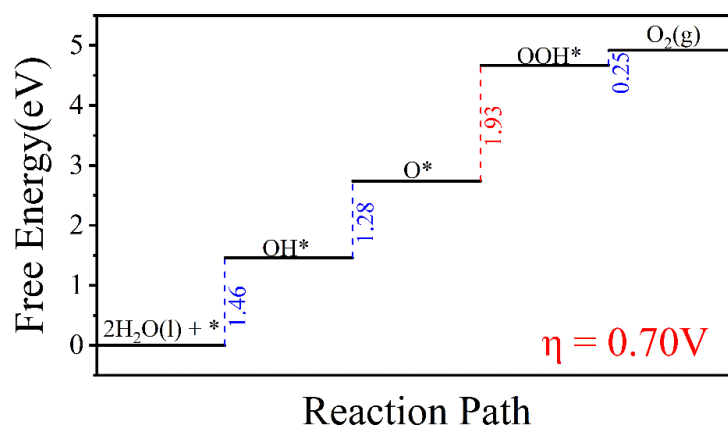

**Figure S6.** The calculated OER Gibbs free energy diagram at T4 site of FeIT monolayer at zero potential, where the elementary reaction with  $\Delta G$  in red represents the potential-determining step.

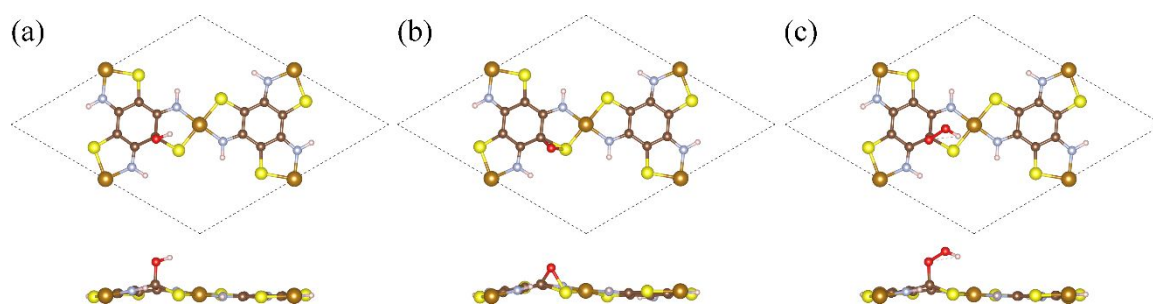

**Figure S7.** (a-c) The structures of the OER intermediates OH\*, O\* and OOH\* at the T4 site of FeIT monolayer.
